# Supplementary material for: Cancer burden in individuals with single versus double pathogenic variants in cancer susceptibility genes
Source: PubMed Central journal article supplement — Genet Med Open. 2024 Feb 14;2:101829. doi: 10.1016/j.gimo.2024.101829 (PMC11613565; doi:10.1016/j.gimo.2024.101829), 2024-02-14
Supplement: mmc1.pdf [file mmc1.pdf]

## Supplementary Material

- **Supplemental Table 1.** Gene list and NCBI reference sequence
- **Supplemental Table 2.** Frequency of multiple primary cancers by most frequent double pathogenic variant (DPV) combination matched to single PV controls  
(Please see the separate Excel file posted online.)
- **Supplemental Table 3.** Clinical and tumor characteristics of females with DPVs with breast, ovarian and colorectal cancer compared to single PV controls  
(Please see the separate Excel file posted online.)
- **Supplemental Table 4.** Female breast cancer (BC) and hormone receptor (HR) for individuals with DPVs by gene combination

**Supplemental Table 1: Gene list and NCBI reference sequence**

| Gene           | NCBI Reference Sequence              | Gene           | NCBI Reference Sequence |
|----------------|--------------------------------------|----------------|-------------------------|
| <i>AIP</i>     | NM_003977.2                          | <i>NF2</i>     | NM_000268.3             |
| <i>ALK</i>     | NM_004304.4                          | <i>PALB2</i>   | NM_000268.3             |
| <i>APC</i>     | NM_000038.5                          | <i>PHOX2B</i>  | NM_024675.3             |
| <i>ATM</i>     | NM_000051.3                          | <i>PMS2</i>    | NM_000535.5             |
| <i>BAP1</i>    | NM_004656.2                          | <i>POLD1</i>   | NM_002691.2             |
| <i>BARD1</i>   | NM_000465.2                          | <i>POLE</i>    | NM_006231.2             |
| <i>BLM</i>     | NM_000057.2                          | <i>POT1</i>    | NM_015450.2             |
| <i>BMPR1A</i>  | NM_004329.2                          | <i>PRKAR1A</i> | NM_002734.3             |
| <i>BRCA1</i>   | NM_007294.3                          | <i>PTCH1</i>   | NM_000264.3             |
| <i>BRCA2</i>   | NM_000059.3                          | <i>PTEN</i>    | NM_000314.4             |
| <i>BRIP1</i>   | NM_032043.2                          | <i>RAD50</i>   | NM_005732.3             |
| <i>CDH1</i>    | NM_004360.3                          | <i>RAD51C</i>  | NM_058216.1             |
| <i>CDK4</i>    | NM_000075.3                          | <i>RAD51D</i>  | NM_002878.3             |
| <i>CDKN1B</i>  | NM_004064.3                          | <i>RB1</i>     | NM_000321.2             |
| <i>CDKN2A</i>  | NM_000077.4 and NM_058195.3 (p14ARF) | <i>RET</i>     | NM_020975.4             |
| <i>CHEK2</i>   | NM_007194.3                          | <i>SDHA</i>    | NM_004168.2             |
| <i>DICER1</i>  | NM_007194.3                          | <i>SDHAF2</i>  | NM_017841.2             |
| <i>FANCC</i>   | NM_177438.2                          | <i>SDHB</i>    | NM_003000.2             |
| <i>FH</i>      | NM_000136.2                          | <i>SDHC</i>    | NM_003001.3             |
| <i>FLCN</i>    | NM_000143.3                          | <i>SDHD</i>    | NM_003002.2             |
| <i>GALNT12</i> | NM_024642.4                          | <i>SMAD4</i>   | NM_005359.5             |
| <i>HOXB13</i>  | NM_006361.5                          | <i>SMARCA4</i> | NM_001128849.1          |
| <i>MAX</i>     | NM_002382.3                          | <i>SMARCB1</i> | NM_003073.3             |
| <i>MEN1</i>    | NM_130799.2                          | <i>SMARCE1</i> | NM_002079.4             |
| <i>MET</i>     | NM_000245.1                          | <i>STK11</i>   | NM_000455.4             |
| <i>MITF</i>    | NM_000248.3                          | <i>SUFU</i>    | NM_016169.3             |
| <i>MUTYH</i>   | NM_001128425.1                       | <i>TMEM127</i> | NM_017849.3             |
| <i>MRE11A</i>  | NM_005591.3                          | <i>TP53</i>    | NM_000546.4             |
| <i>MLH1</i>    | NM_000249.3                          | <i>TSC1</i>    | NM_000368.4             |
| <i>MSH2</i>    | NM_000251.1                          | <i>TSC2</i>    | NM_000548.              |
| <i>MSH6</i>    | NM_000179.2                          | <i>VHL</i>     | NM_000551.3             |
| <i>NBN</i>     | NM_002485.4                          | <i>XRCC2</i>   | NM_005431.1             |
| <i>NF1</i>     | NM_000267.3                          |                |                         |

**Supplemental Table 4: Female breast cancer (BC) and hormone receptor (HR) for individuals with DPVs by gene combination**

| <b>Concurrent PVs</b> | <b>Total females</b> | <b>N of female BC (%)<sup>a</sup></b> | <b>ER/PR provided (%)<sup>b</sup></b> | <b>ER/PR-positive tumors (%)<sup>c</sup></b> | <b>HER2 Provided<sup>b</sup></b> | <b>HER2-positive tumors (%)<sup>d</sup></b> |
|-----------------------|----------------------|---------------------------------------|---------------------------------------|----------------------------------------------|----------------------------------|---------------------------------------------|
| <i>ATM+BRCA2</i>      | 19                   | 11 (57.9)                             | 6 (54.5)                              | 3 (50.0)                                     | 3 (27.3)                         | 1 (33.3)                                    |
| <i>ATM+CHEK2</i>      | 23                   | 20 (87.0)                             | 15 (75.0)                             | 14 (93.3)                                    | 13 (65.0)                        | 2 (15.4)                                    |
| <i>BRCA1+CHEK2</i>    | 17                   | 9 (52.9)                              | 7 (77.7)                              | 6 (85.7)                                     | 7 (77.7)                         | 2 (28.6)                                    |
| <i>CHEK2+CHEK2</i>    | 18                   | 17 (94.4)                             | 12 (70.6)                             | 12 (100.0)                                   | 5 (29.4)                         | 2 (40.0)                                    |
| <i>CHEK2+PALB2</i>    | 18                   | 17 (94.4)                             | 15 (88.2)                             | 14 (82.4)                                    | 11 (64.7)                        | 0 (0)                                       |
| <i>BRCA2+CHEK2</i>    | 15                   | 10 (66.7)                             | 7 (70.0)                              | 6 (85.7)                                     | 6 (60.0)                         | 1 (16.7)                                    |
| <i>ATM+PALB2</i>      | 12                   | 9 (75.0)                              | 4 (44.4)                              | 3 (75.0)                                     | 4 (44.4)                         | 2 (50.0)                                    |
| <i>ATM+BRCA1</i>      | 10                   | 4 (40.0)                              | 2 (50.0)                              | 1 (50.0)                                     | 2 (50.0)                         | 1 (50.0)                                    |
| <i>BRCA1+BRCA2</i>    | 9                    | 5 (55.6)                              | 5 (100.0)                             | 1 (20.0)                                     | 5 (100.0)                        | 1 (20.0)                                    |

<sup>a</sup>The percentage represents those among females.

<sup>b</sup>The percentage represents those among all females with breast cancer.

<sup>c</sup>The percentage represents those among all females with breast cancer and ER/PR subtype data.

<sup>d</sup>The percentage represents those among all females with breast cancer and HER2 subtype data.

PV = pathogenic or likely pathogenic variant (single noun)

PVs = pathogenic or likely pathogenic variants (plural noun)

DPVs= double PVs in one individual (plural noun)

ER: Estrogen receptor

PR: Progesterone receptor

HER2: Human epidermal growth factor receptor 2
